# Supplementary material for: Long Non Coding RNA MALAT1 Promotes Tumor Growth and Metastasis by inducing Epithelial-Mesenchymal Transition in Oral Squamous Cell Carcinoma
Source: PubMed Central journal article supplement (PMC4629155; doi:10.1038/srep15972), 2015-11-02

**Long Non Coding RNA MALAT1 Promotes Tumor Growth and Metastasis by  
inducing Epithelial-Mesenchymal Transition in Oral Squamous Cell Carcinoma**

Xuan Zhou<sup>1\*</sup>, Su Liu<sup>1\*</sup>, Guoshuai Cai<sup>2\*</sup>, Lingping Kong<sup>1\*</sup>, Tingting Zhang<sup>3</sup>, Yu Ren<sup>4</sup>,  
Yansheng Wu<sup>1</sup>, Mei Mei<sup>4</sup>, Lun Zhang<sup>1</sup> & Xudong Wang<sup>1</sup>

## **Supplementary Figure**

**Overexpression of MALAT1 enhanced OSCC invasion and migration *in vitro*.** (a) and (b), pCNDA-MALAT1 transfection significantly increased Hep-2 cell migration determined by wound healing assay ( $P<0.05$ ). (c) and (d), pCNDA-MALAT1 transfection significantly increased Hep-2 cell migration and invasion determined by transwell assays ( $P<0.05$ ). (e), MALAT1 overexpression significantly increased the expression of N-cadherin, Vimentin, Slug, MMP-9 and VEGF in Hep-2 cell determined by western blots analysis ( $P<0.05$ ). GAPDH was used as loading control. The gels were cropped, but those gels were run under the same experimental condition.

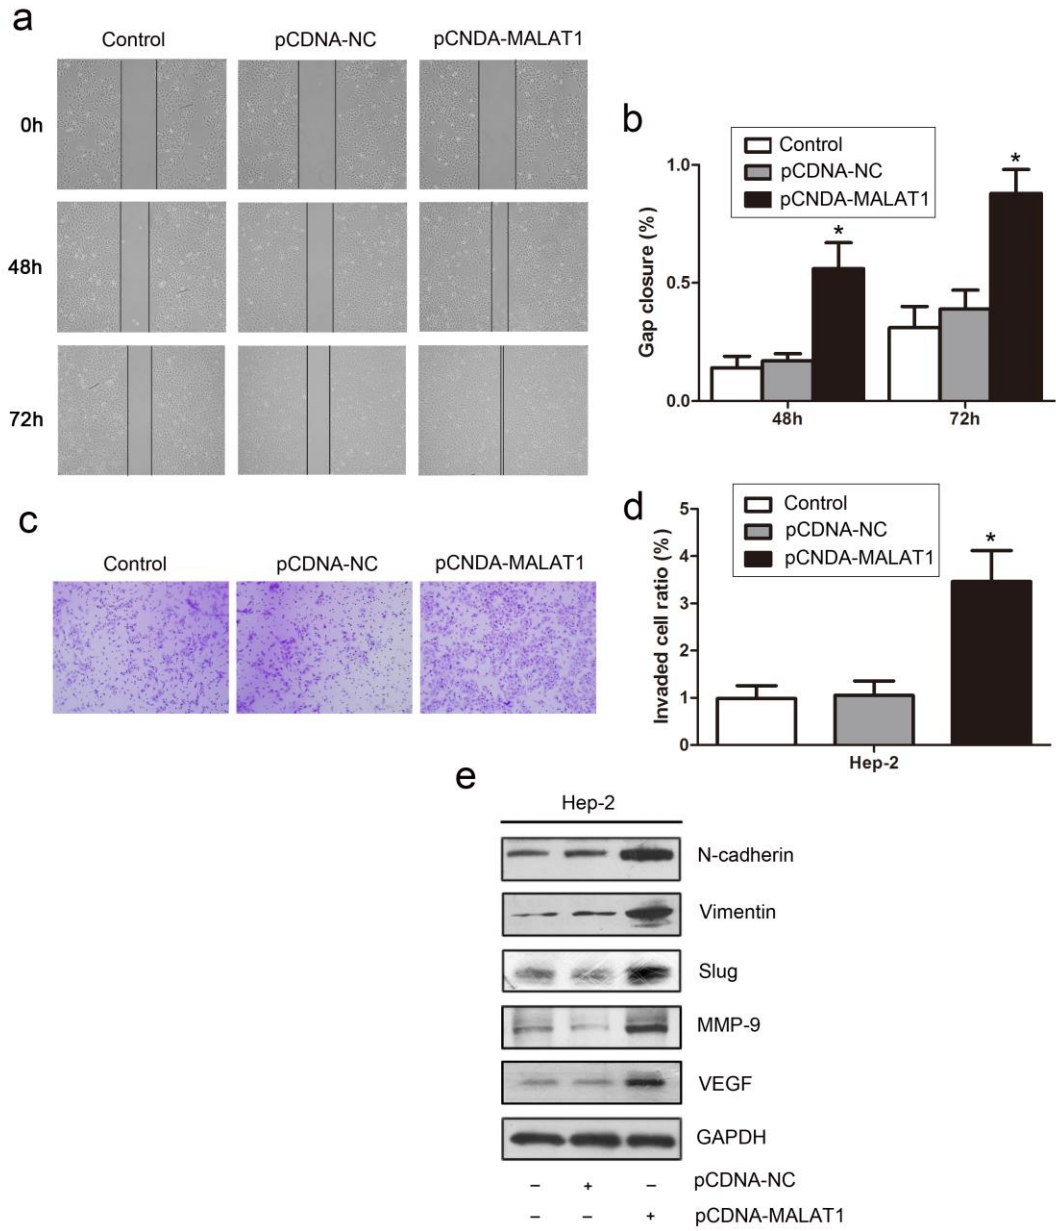

Supplement: srep15972-s1.pdf [file srep15972-s1.pdf]
